# Supplementary material for: Assessment of the Finite VolumE Sea Ice Ocean Model (FESOM2.0), Part II: Partial bottom cells, embedded sea ice and vertical mixing library CVMIX
Source: Copernicus journal article supplement (doi:10.5194/gmd-2021-94), 2021-05-07
Supplement: Supplementary file 1 [file gmd-2021-94-supplement.pdf]

## Supplementary:



**Suppl. 1:** Horizontal ocean circulation in the Weddell Sea for partial cell (a) and full cell (b), vertically averaged for the depth range 250-500 m and averaged for the period 1989 to 2009. The white arrow marks the enhanced warm deep water current when using partial cells.



**Suppl. 2:** Temperature (1<sup>st</sup> and 2<sup>nd</sup> column), salinity (3<sup>rd</sup> and 4<sup>th</sup> column) difference between fesom\_KPP and WOA18 (1<sup>st</sup> and 3<sup>rd</sup> column) as well as between fesom\_PP and fesom\_KPP (2<sup>nd</sup> and 4<sup>th</sup> column) averaged for the period 1989 to 2009. From top to bottom, panels show the vertically averaged fields for the depth ranges of 0-250 m, 250-500 m, 500-1000 m, 1000-2000 m and 2000-4000 m.



**Suppl. 3:** Schematic representation of partial bottom cell implementation in FESOM2.0 at elements and vertices.
